# Supplementary material for: Magnetometer in-flight offset accuracy for the BepiColombo spacecraft
Source: Copernicus journal article supplement (doi:10.5194/angeo-2020-2), 2020-01-31
Supplement: Supplementary file [file angeo-2020-2-AC1-supplement.pdf]

First we would like to thank the referee for taking the time to evaluate the manuscript and for the constructive comments which helped to identify potential misunderstandings in the paper.

## Anonymous Referee #1

The submitted manuscript presents an approach to calibrating offsets on the magnetometers onboard BepiColombo's Mercury Planetary Orbiter and Mercury Magnetospheric Orbiter spacecraft. This calibration analysis includes the use of mirror mode wave observations as a method to determine the spin-axis offset. Mio would be able to utilize this approach as a complementary method to an analysis of Alfvénic fluctuations in the pristine solar wind. MPO, on the other hand, will not measure the solar wind and therefore, observations within Mercury's magnetosphere must be used to calibrate measurements. The manuscript presents an analysis of the compressional fluctuations in Mercury's space environment by analyzing four years of MESSENGER magnetometer data. While the analysis presented here is sound and nicely justified, the paper did not convincingly demonstrate that this calibration technique would be sufficient to perform scientific investigations with the MPO magnetic field observations.

We will lower our claims that the method developed and presented in the manuscript is stand-by for immediate applications to the MPO magnetic field data. However, as mentioned in the paper, the method is immediately applicable to the Mio magnetometer because of the need of a single-axis offset determination.

The conclusion describes that 780 hours of observations within the magnetosphere are needed to achieve an accuracy better than 1.0 nT; however, many MESSENGER publications including magnetic field data report on signatures that require measurements within this level of uncertainty.

The magnetic field data, even though not reaching a 1-nT accuracy in the measurements, can certainly be used to a number of publications, but there is no guarantee about the uncertainty or accuracy in the data and care needs to be taken. In particular, if one is interested in finding a magnetic-null (reconnection diffusion region) or low-field phenomena (small-amplitude waves, for example), our method will be of great importance to guarantee how high or low the errors in the data are.

Additionally, the manuscript did not describe whether it is expected that MPO will be able to collect compressible fluctuations for 780 hours or more during the mission lifetime.

Well, a value of 780 hours is a conclusion given by the study; if it is really fulfilled by MPO, we need further studies (MESSENGER data or numerical simulations) and the application of 3D mirror mode method, which is beyond the scope of this paper.

Finally, the major conclusion for application to MPO is that "the 3D mirror mode method developed by (Plaschke et al., 2017) should be applicable to MPO . . ." but the paper does not describe this method or how it differs from the analysis presented here.

The paper primarily focus whether the mirror mode method can be applied in the hermean space environment at all. Indeed the result show that the method can be

directly applied onto Mio. However, the application of the 3-D mirror mode method onto MPO is beyond the scope of the manuscript and is planned to be addressed in a further work. Yet, we will add a paragraph and explain the concept of the 3-D mirror mode method in view of MPO spacecraft.

The analysis in this paper only provides a single-axis offset– how does this methodology provide vector calibration?.

We focus on applications to single-axis offset in the manuscript. Generalization to 3-D offset components is a related yet different issue. We will discuss a paragraph and discuss how to generalize the method to 3 components.

Prior to publication, these issues need to be addressed regarding a demonstration of the 3D mirror mode and the ability to use MPO calibrated data with an accuracy of ~1.0 nT for mission science.

There might be a misunderstanding. The manuscript focuses on the calibration method to single-axis offset and discuss the applicability and limits with respect to Mio and MPO magnetometers. We are not claiming that the 1D mirror mode method is readily applicable to MPO magnetometer; Of course, we agree that the 3-D method needs to be developed and tested for MPO; this should be done in a separate paper otherwise the paper has too many goals.

Additional comments are listed below:

Paragraph beginning at line 65: The text should also include a description of performing spacecraft rolls as a well-established method for determining offsets. This has been done with routinely with many missions, most recently including MAVEN at Mars and Parker Solar Probe.

This will be added to the text.

Please change all references to MESSENGER into the past tense: Line 100: “MESSENGER is highly” -> “MESSENGER was highly” Line 101: “altitudes ranges” -> “altitudes ranged” Line 101: “form” -> “from” Line 102: “MESSENGER crosses the magnetopause” -> “MESSENGER crossed the magnetopause” Line 107: “MESSENGER is a three-axis-stabilized” -> “MESSENGER was a three-axis-stabilized”

This will be changed in the text.

Line 150-152: Please define the mean-field-aligned coordinates system and how it is calculated.

This will be added to the text.

Line 225 – 227: “Note that, although standard deviation of the individual offsets  $O_{zn}$  might be large, a larger number of samples or events helps lower the value of the

standard deviation of the mean offset  $O_{zn}$  (standard error in Table 2).” However, given the small percentage of occurrence rate showed in table 1 – will a large number of samples actually be possible?

As mentioned above, if it is really fulfilled by BepiColombo, we need further information about the final orbit of the spacecraft. At this point, we can only show that for MESSENGER the sample size for the mirror mode method is indeed large enough to reproduce the 1D offset determination which was originally obtained from the Alfvénic fluctuation method.

Line 270-273: “We find that the offset determination method proposed by Plaschke and Narita (2016) is well applicable to the data from the Hermean environment. It can hence be used for in-flight calibration of the magnetometers onboard Mio and MPO.”– While the offset analysis presented here is sound and well-described, it does not demonstrate the application of Plaschke et al (2017) to the MPO dataset, which is most important to derive calibrated vector measurements.

Accordingly, we have lowered our claims that the method developed and presented in the manuscript is stand-by for immediate applications to the MPO magnetic field data and thus will delete the sentence.

Line 274: “As is been seen in . . .” please revise wording  
This will be changed in the text.
